# Supplementary material for: Age Modifies the Association of Dietary Protein Intake with All-Cause Mortality in Patients with Chronic Kidney Disease
Source: MDPI journal article supplement (doi:10.3390/nu10111744), 2018-11-13
Supplement: s1 [file s1]

Supplemental Table 1 Protein and sodium intake from two 24-h urine samples, coefficients of variation, and within-patient to between-patient variance ratios shown per sex.

|                                   | First Sample |      | Second Sample |      | CV <sub>w</sub> (%) | CV <sub>b</sub> (%) | VR   |
|-----------------------------------|--------------|------|---------------|------|---------------------|---------------------|------|
|                                   | Mean         | SD   | Mean          | SD   |                     |                     |      |
| Male patients ( <i>n</i> = 86)    |              |      |               |      |                     |                     |      |
| Protein intake (g/day)            | 36.7         | 9.6  | 35.4          | 8.5  | 1.57                | 1.80                | 0.87 |
| Sodium intake (mmol/day)          | 64.8         | 20.9 | 51.1          | 17.3 | 4.97                | 7.95                | 0.62 |
| Female patients ( <i>n</i> = 204) |              |      |               |      |                     |                     |      |
| Protein intake (g/day)            | 45.8         | 11.8 | 43.9          | 10.9 | 1.83                | 2.26                | 0.81 |
| Sodium intake (mmol/day)          | 74.3         | 27.5 | 55.0          | 21.5 | 5.33                | 10.31               | 0.52 |

CV<sub>b</sub>, coefficient of between-patient variation; CV<sub>w</sub>, coefficient of within-patient variation; SD, standard deviation; VR, ratio of within- to between-patient variance.

Supplemental Table 2 Number of days and number of patients required to ensure accuracy in the group's and individual patients' usual ("true") mean intake based on 24-h urine collection, shown per sex 1.

|                                                | Male Patients  |               | Female Patients |               |
|------------------------------------------------|----------------|---------------|-----------------|---------------|
|                                                | Protein Intake | Sodium Intake | Protein Intake  | Sodium Intake |
| Specified % deviation <sup>2</sup>             |                |               |                 |               |
| 2.5                                            | 4              | 54            | 5               | 83            |
| 5                                              | 1              | 14            | 1               | 21            |
| 10                                             | 0              | 3             | 0               | 5             |
| 20                                             | 0              | 1             | 0               | 1             |
| Specified correlation coefficient <sup>3</sup> |                |               |                 |               |
| 0.80                                           | 2              | 1             | 1               | 1             |
| 0.85                                           | 2              | 2             | 2               | 1             |
| 0.90                                           | 4              | 3             | 3               | 2             |
| 0.95                                           | 8              | 6             | 7               | 5             |
| Specified % deviation <sup>4</sup>             |                |               |                 |               |
| 5                                              | 0              | 4             | 1               | 4             |
| 10                                             | 0              | 1             | 0               | 1             |
| 20                                             | 0              | 0             | 0               | 0             |
| 30                                             | 0              | 0             | 0               | 0             |

<sup>1</sup> Number of patients or number of days is shown. When a value was less than 1 day or 1 patient, it was rounded to the nearest whole number. CV<sub>b</sub>, coefficient of between-patient variation; CV<sub>w</sub>, coefficient of within-patient variation; VR, ratio of within- to between-patient variance. <sup>2</sup> Group size for 24-h urine collection assuming a single observation for each patient =  $1.96^2 \times [(CV_b^2 + CV_w^2) / D_0^2]$ , where  $D_0$  = the specified % deviation of the group mean intake from the group usual ("true") mean intake. <sup>3</sup> Number of days of 24-h urine collection needed for estimation of specified level of correlation coefficient =  $[r^2 / (1 - r^2)] \times VR$ , where  $r$  = unobservable correlation coefficient between observed and usual ("true") mean intake of patients and VR = within-patient/between-patient variance ratio (CV<sub>w</sub> / CV<sub>b</sub>). <sup>4</sup> Number of days needed for estimation of patient's "true" mean intake with 95% CI within the specified % deviation required for 24-h urine collection =  $(1.96 \times CV_w / D_1)^2$ , where  $D_1$  = the specified % deviation of patient mean from the usual ("true") mean intake.
